# Supplementary material for: Self-Healable, Strong, and Tough Polyurethane Elastomer Enabled by Carbamate-Containing Chain Extenders Derived from Ethyl Carbonate
Source: MDPI journal article supplement (doi:10.3390/polym14091673), 2022-04-20
Supplement: s1 [file s1]

## Supplementary Information

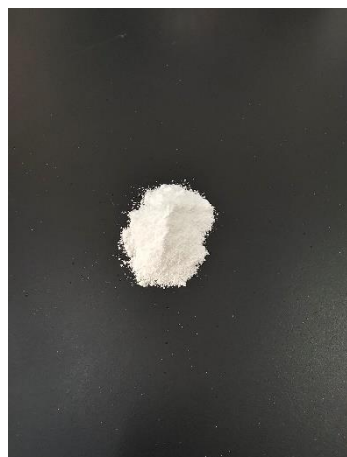

Figure S1. BDM powder.

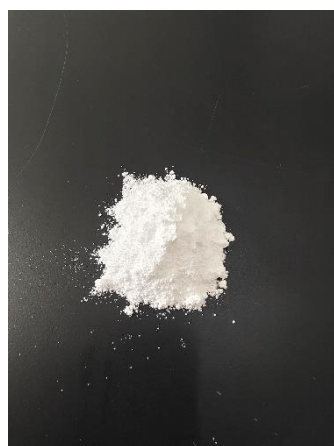

Figure S2. BDH powder.

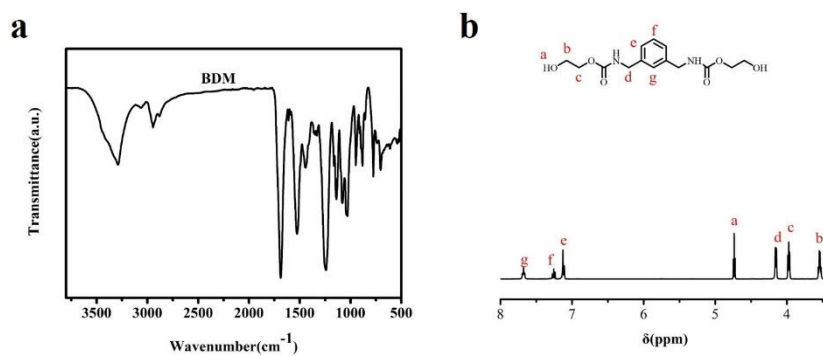

Figure S3. (a) FTIR spectra of BDH; (b)  $^1\text{H}$ NMR spectrum of BDH.

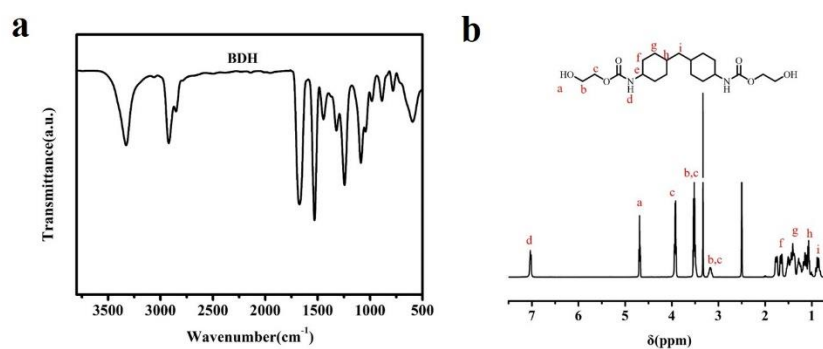

**Figure S4.** (a) FTIR spectra of BDH; (b) <sup>1</sup>H NMR spectrum of BDH.

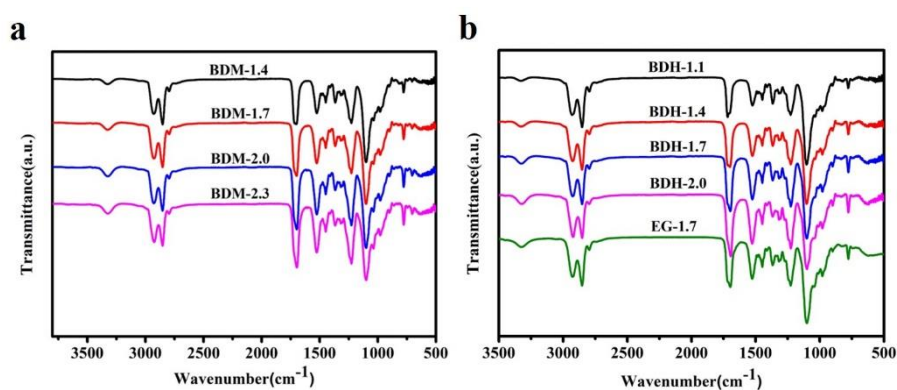

**Figure S5.** (a) FTIR spectra of BDM-based elastomers; (b) FTIR spectra of BDH-based and EG-1.7 elastomers.

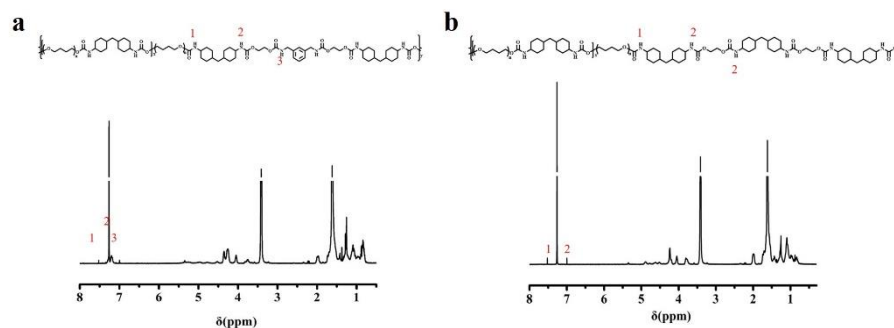

**Figure S6.** (a) <sup>1</sup>H NMR spectrum of BDM-1.7 elastomer, chemical shift for peak 1, 2 and 3 is 7.51, 7.20 and 7.00 ppm, respectively; (b) <sup>1</sup>H NMR spectrum of BDH-1.7 elastomer, chemical shift for peak 1 and 2 is 7.55, 7.01 ppm, respectively.

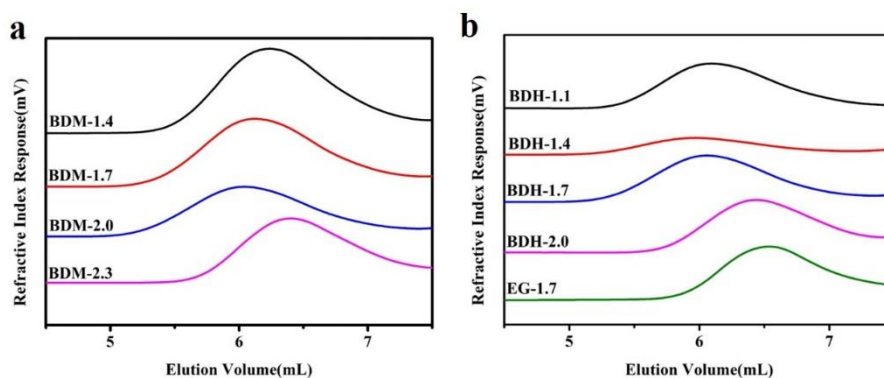

**Figure S7.** (a) GPC profiles for BDM-based elastomers; (b) GPC profiles for BDH-based and EG-1.7 elastomers.

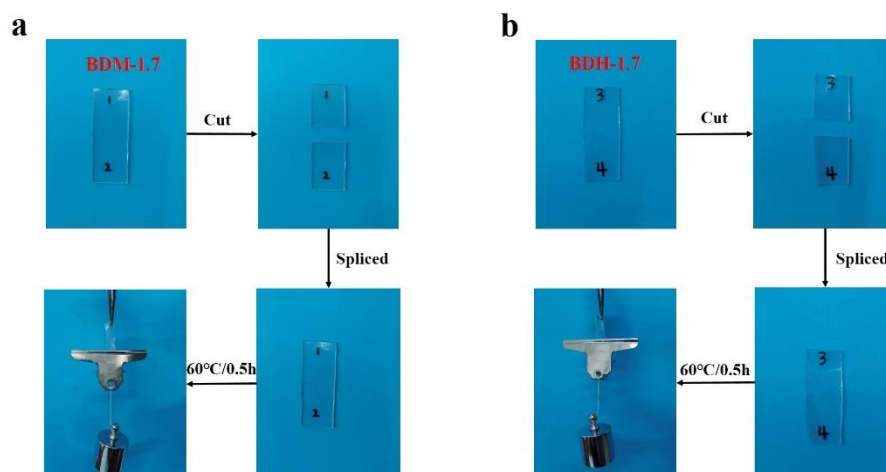

**Figure S8.** (a) and (b) The photos show that BDM-1.7 and BDH-1.7 elastomer tapes can be cut and processed at 60 °C for 0.5 h after splicing, which can increase the load of 500 g.

**Table S1.** Characteristic peak assignments of BDM.

| Assignments                   | Wavenumber (cm <sup>-1</sup> ) |
|-------------------------------|--------------------------------|
| $\nu$ (O-H)                   | 3450,3411                      |
| $\nu$ (N-H)                   | 3289                           |
| $\nu_{s-trans}$ (N-H)         | 3063                           |
| $\nu_{as}$ (CH <sub>2</sub> ) | 2928                           |
| $\nu_a$ (CH <sub>2</sub> )    | 2852                           |
| $\nu$ (C=O)                   | 1687                           |
| m-benzene ring                | 1603,1593,1493, 777,704        |
| $\delta$ (N-H)                | 1525                           |
| $\nu$ (C-O-C)                 | 1138                           |
| $\nu$ (C-OH)                  | 1044                           |

**Table S2.** Characteristic peak assignments of BDH.

| Assignments                | Wavenumber (cm <sup>-1</sup> ) |
|----------------------------|--------------------------------|
| $\nu$ (N-H)                | 3324                           |
| $\nu_{s-trans}$ (N-H)      | 3060                           |
| $\nu_a$ (CH <sub>2</sub> ) | 2921                           |
| $\nu_s$ (CH <sub>2</sub> ) | 2855                           |
| $\nu$ (C=O)                | 1689                           |
| $\delta$ (N-H)             | 1528                           |
| $\nu$ (C-O-C)              | 1133                           |
| $\nu$ (C-OH)               | 1041                           |

**Table S3.** Ingredients of BDM-based elastomers.

| Sample  | R value | Molar feed ratio <sup>a</sup> | Hard segments (wt%) |      |
|---------|---------|-------------------------------|---------------------|------|
|         |         |                               | Short               | Long |
| BDM-1.4 | 1.4     | 1 : 1.4 : 0.4                 | 10.5                | 22.5 |
| BDM-1.7 | 1.7     | 1 : 1.7 : 0.7                 | 4.7                 | 35.2 |
| BDM-2.0 | 2.0     | 1 : 2.0 : 1.0                 | 0                   | 45.6 |
| BDM-2.3 | 2.3     | 1 : 2.3 : 1.3                 | 0                   | 50.2 |

<sup>a</sup> PTMEG : HMDI : BDM.

**Table S4.** Ingredients of BDH-based elastomers.

| Sample  | R value | Molar feed ratio <sup>a</sup> | Hard segments (wt%) |      |
|---------|---------|-------------------------------|---------------------|------|
|         |         |                               | Short               | Long |
| BDH-1.1 | 1.1     | 1 : 1.1 : 0.1                 | 10.9                | 13.8 |
| BDH-1.4 | 1.4     | 1 : 1.4 : 0.4                 | 10.4                | 23.9 |
| BDH-1.7 | 1.7     | 1 : 1.7 : 0.7                 | 4.6                 | 37.2 |
| BDH-2.0 | 2.0     | 1 : 2.0 : 1.0                 | 0                   | 53.7 |
| EG-1.7  | 1.7     | 1 : 1.7 : 0.7                 | 5.3                 | 27.6 |

<sup>a</sup> PTMEG : HMDI : BDH.**Table S5.** Characteristic peak assignments of BDM-based elastomers.

| Assignments                              | Wavenumber (cm <sup>-1</sup> ) |
|------------------------------------------|--------------------------------|
| free $\nu$ (N-H)                         | 3454                           |
| H-bonded $\nu$ (N-H)                     | 3323                           |
| $\nu_a$ (CH <sub>2</sub> )               | 2928                           |
| $\nu_s$ (CH <sub>2</sub> )               | 2852                           |
| $\nu_s$ (CH <sub>2</sub> )               | 2796                           |
| Free $\nu$ (C=O) amide I of urethane     | 1717                           |
| H-bonded $\nu$ (C=O) amide I of urethane | 1697                           |
| m-benzene ring                           | 1609, 777, 704                 |
| $\delta$ (N-H)                           | 1525                           |
| $\nu$ (C-O-C)                            | 1100                           |

**Table S6.** Characteristic peak assignments of BDH-based elastomers.

| Assignments                              | Wavenumber (cm <sup>-1</sup> ) |
|------------------------------------------|--------------------------------|
| free $\nu$ (N-H)                         | 3450                           |
| H-bonded $\nu$ (N-H)                     | 3321                           |
| $\nu_a$ (CH <sub>2</sub> )               | 2921                           |
| $\nu_s$ (CH <sub>2</sub> )               | 2851                           |
| $\nu_s$ (CH <sub>2</sub> )               | 2796                           |
| free $\nu$ (C=O) amide I of urethane     | 1721                           |
| H-bonded $\nu$ (C=O) amide I of urethane | 1693                           |
| $\delta$ (N-H)                           | 1526                           |
| $\nu$ (C-O-C)                            | 1103                           |

**Table S7.** Information of molecular weight of BDM-based elastomers.

| Sample  | M <sub>n</sub> (g/mol) | M <sub>w</sub> (g/mol) | PDI <sup>a</sup> |
|---------|------------------------|------------------------|------------------|
| BDM-1.4 | $1.312 \times 10^5$    | $2.722 \times 10^5$    | 2.08             |
| BDM-1.7 | $1.599 \times 10^5$    | $3.557 \times 10^5$    | 2.23             |
| BDM-2.0 | $1.883 \times 10^5$    | $4.436 \times 10^5$    | 2.36             |
| BDM-2.3 | $9.524 \times 10^4$    | $1.822 \times 10^5$    | 1.91             |

<sup>a</sup> polydispersity index.**Table S8.** Information of molecular weight of BDH-based and EG-1.7 elastomers.

| Sample  | M <sub>n</sub> (g/mol) | M <sub>w</sub> (g/mol) | PDI <sup>a</sup> |
|---------|------------------------|------------------------|------------------|
| BDH-1.1 | $1.585 \times 10^5$    | $3.465 \times 10^5$    | 2.19             |
| BDH-1.4 | $2.446 \times 10^5$    | $4.913 \times 10^5$    | 2.00             |
| BDH-1.7 | $1.940 \times 10^5$    | $4.086 \times 10^5$    | 2.10             |
| BDH-2.0 | $9.635 \times 10^4$    | $1.697 \times 10^5$    | 1.76             |
| EG-1.7  | $6.996 \times 10^4$    | $1.409 \times 10^5$    | 2.01             |

<sup>a</sup> polydispersity index.

**Table S9.** Mechanical properties of BDM-based elastomers obtained from tensile tests.

| Sample  | Tensile strength (MPa) | Elongation at break (%) | Toughness (MJ/m <sup>3</sup> ) |
|---------|------------------------|-------------------------|--------------------------------|
| BDM-1.4 | 0.61 ± 0.03            | 805 ± 52                | 3.73 ± 0.19                    |
| BDM-1.7 | 20.6 ± 1.3             | 1667 ± 56               | 83.5 ± 2.0                     |
| BDM-2.0 | 36.3 ± 1.3             | 1230 ± 61               | 122.3 ± 4.0                    |
| BDM-2.3 | 43.9 ± 2.4             | 1144 ± 40               | 135.8 ± 6.8                    |

**Table S10.** Mechanical properties of BDH-based and EG-1.7 elastomers obtained from tensile tests.

| Sample  | Tensile strength (MPa) | Elongation at break (%) | Toughness (MJ/m <sup>3</sup> ) |
|---------|------------------------|-------------------------|--------------------------------|
| BDH-1.1 | 0.19 ± 0.01            | 608 ± 93                | 0.58 ± 0.29                    |
| BDH-1.4 | 12.9 ± 0.7             | 1740 ± 25               | 57.7 ± 1.1                     |
| BDH-1.7 | 37.1 ± 1.7             | 1128 ± 53               | 118.8 ± 5.1                    |
| BDH-2.0 | 44.0 ± 3.3             | 1079 ± 20               | 197.9 ± 7.9                    |
| EG-1.7  | 0.13 ± 0.02            | 491 ± 30                | 0.43 ± 0.1                     |

**Table S11.** The Self-healing efficiencies of BDM-1.7 elastomers.

|                              | Sample  | 25 °C/24h | 40 °C/12h | 60 °C/24h |
|------------------------------|---------|-----------|-----------|-----------|
| Tensile strength S.E. (%)    | BDM-1.7 | 24.7      | 60.4      | 99.8      |
| Elongation at break S.E. (%) | BDM-1.7 | 64.9      | 90.0      | 100.0     |
| Toughness S.E. (%)           | BDM-1.7 | 30.2      | 67.7      | 98.8      |

**Table S12.** The Self-healing efficiencies of BDH-1.7 elastomers.

|                              | Sample  | 25 °C/24h | 40 °C/12h | 60 °C/24h | 60 °C/4h | 60 °C/8h | 60 °C/12h |
|------------------------------|---------|-----------|-----------|-----------|----------|----------|-----------|
| Tensile strength S.E. (%)    | BDH-1.7 | 19.2      | 64.0      | 95.2      | 50.7     | 61.6     | 77.0      |
| Elongation at break S.E. (%) | BDH-1.7 | 52.2      | 87.1      | 99.4      | 81.5     | 87.3     | 93.2      |
| Toughness S.E. (%)           | BDH-1.7 | 16.7      | 67.8      | 95.6      | 51.6     | 59.4     | 79.7      |
